# Supplementary material for: Co-crystals and molecular salts of carboxylic acid/pyridine complexes: can calculated pKa's predict proton transfer? A case study of nine complexes
Source: Royal Society of Chemistry journal article supplement (doi:10.1039/c5ce00102a), 2015-01-01
Supplement: c5ce00102a1.pdf [file c5ce00102a1.pdf]

|    | CSD Ref Code | Pyridine( Neutral/Cation)                  | Acid (Neutral/Anion)              | CAS        |            | pKa (H-base) | pKa(acid) | delta | Result     | Expected        |
|----|--------------|--------------------------------------------|-----------------------------------|------------|------------|--------------|-----------|-------|------------|-----------------|
| 1  | USOBOU       | isonicotinonitrile                         | 4-Methylbenzoic acid              | 100-48-1   | 99-94-5    | 1.92         | 4.37      | -2.45 | CO-CRYSTAL | CO-CRYSTAL      |
| 2  | OCAMUC       | 4-(pyridin-4-ylsulfanyl)pyridine           | 2-Aminobenzoic acid               | 2645-22-9  | 118-92-2   | 3.6          | 4.94      | -1.34 | CO-CRYSTAL | CO-CRYSTAL      |
| 3  | PAPFOB       | 5-nitroisoquinoline                        | 4-Aminobenzoic acid               | 607-32-9   | 150-13-0   | 3.55         | 4.86      | -1.31 | CO-CRYSTAL | CO-CRYSTAL      |
| 4  | VAKTOR       | isonicotinamide                            | 4-Hydroxybenzoic acid             | 1453-82-3  | 99-96-7    | 3.39         | 4.57      | -1.18 | CO-CRYSTAL | CO-CRYSTAL      |
| 5  | RUYHEZ01     | pyridine-3-carboxamide                     | 4-Hydroxybenzoic acid             | 98-92-0    | 99-96-7    | 3.54         | 4.57      | -1.03 | CO-CRYSTAL | CO-CRYSTAL      |
| 6  | BUDWEC       | isonicotinamide                            | benzoic acid                      | 1453-82-3  | 65-85-0    | 3.39         | 4.2       | -0.81 | CO-CRYSTAL | CO-CRYSTAL      |
| 7  | HONVAI       | 4,4'-bipyridine                            | 3-hydrobenzoic acid               | 553-26-4   | 99-06-9    | 3.27         | 4.08      | -0.81 | CO-CRYSTAL | CO-CRYSTAL      |
| 8  | OCEBUV       | Isonicotinamide                            | 2-naphthoic acid                  | 1453-82-3  | 93-09-4    | 3.39         | 4.2       | -0.81 | CO-CRYSTAL | CO-CRYSTAL      |
| 9  | PAXTIS       | 4,4'-bipyridine                            | 4-Carboxybenzeneboronic acid      | 553-26-4   | 14047-29-1 | 3.27         | 4.08      | -0.81 | CO-CRYSTAL | CO-CRYSTAL      |
| 10 | FADHEZ       | (Isonicotinohydrazide)                     | 4-hydroxybenzoic acid             | 54-85-3    | 99-96-7    | 3.79         | 4.57      | -0.78 | CO-CRYSTAL | CO-CRYSTAL      |
| 11 | ASAXUN01     | isonicotinamide                            | 4-fluorobenzoic acid              | 1453-82-3  | 456-72-4   | 3.39         | 4.14      | -0.75 | CO-CRYSTAL | CO-CRYSTAL      |
| 12 | COWJAA       | 4-(2-amino-4-methylpyrimidin-6-yl)pyridine | 4-iodobenzoic acid                | 90916-52-2 | 69-58-9    | 3.31         | 4.02      | -0.71 | CO-CRYSTAL | CO-CRYSTAL      |
| 13 | XAQQIQ       | Nicotinamide                               | 3-hydroxybenzoic acid             | 98-92-0    | 99-06-0    | 3.54         | 4.08      | -0.54 | CO-CRYSTAL | CO-CRYSTAL      |
| 14 | CACGUK       | isonicotinamide                            | 3-fluorobenzoic acid              | 1453-82-3  | 455-38-9   | 3.39         | 3.86      | -0.47 | CO-CRYSTAL | CO-CRYSTAL      |
| 15 | VEFWAF       | 4,4'-bipyridine                            | 4-bromo-3,5-dihydroxybenzoic acid | 553-26-4   | 16534-12-6 | 3.27         | 3.73      | -0.46 | CO-CRYSTAL | CO-CRYSTAL      |
| 16 | FADHUP       | N'-isopropylideneisonicotinohydrazide      | 3-hydrobenzoic acid               | 4813-4-1   | 99-06-9    | 3.71         | 4.08      | -0.37 | CO-CRYSTAL | CO-CRYSTAL      |
| 17 | HOLJAU03     | 4-acetylpyridine                           | 3-fluorobenzoic acid              | 1122-54-9  | 455-38-9   | 3.57         | 3.86      | -0.29 | CO-CRYSTAL | CO-CRYSTAL      |
| 18 | XUNGIW       | 4,4'-Bipyridyl                             | isophthalic acid                  | 553-26-4   | 121-91-5   | 3.27         | 3.53      | -0.26 | CO-CRYSTAL | CO-CRYSTAL      |
| 19 | PAVXAN       | 4,4'-Bipyridine                            | terephthalic acid                 | 553-26-4   | 100-21-0   | 3.27         | 3.49      | -0.22 | CO-CRYSTAL | CO-CRYSTAL      |
| 20 | ASAXOH       | isonicotinamide                            | 3-nitrobenzoic acid               | 1453-82-3  | 121-92-6   | 3.39         | 3.48      | -0.09 | CO-CRYSTAL | CO-CRYSTAL      |
| 21 | UDUZIC       | 4,4'-Bipyridyl                             | 3-aminobenzoic acid               | 553-26-4   | 99-05-8    | 3.27         | 3.34      | -0.07 | CO-CRYSTAL | CO-CRYSTAL      |
| 22 | AJAKEB       | isonicotinamide                            | 4-nitrobenzoic acid               | 1453-82-3  | 62-23-7    | 3.39         | 3.42      | -0.03 | CO-CRYSTAL | CO-CRYSTAL      |
| 23 | VORLOE       | (P)-4,4'-Dipyridyl disulfide               | isophthalic acid                  | 2645-22-9  | 121-91-5   | 3.6          | 3.53      | 0.07  | CO-CRYSTAL | CO-CRYSTAL/SALT |
| 24 | PUJKOV       | 2-Amino-5-chloropyridinium                 | 4-hydroxybenzoate                 | 1072-98-6  | 99-96-7    | 4.67         | 4.57      | 0.1   | SALT       | CO-CRYSTAL/SALT |
| 25 | URUDER       | Isonicotinohydrazide                       | 4-aminosalicylic acid             | 54-85-3    | 65-49-6    | 3.79         | 3.58      | 0.21  | CO-CRYSTAL | CO-CRYSTAL/SALT |
| 26 | PUJNIS       | 2-Amino-5-chloropyridine                   | benzoic acid                      | 1072-98-6  | 65-85-0    | 4.67         | 4.2       | 0.47  | SALT       | CO-CRYSTAL/SALT |
| 27 | FADHID       | (Isonicotinohydrazide)                     | 2,4-dihydroxybenzoic acid         | 54-85-3    | 89-86-3    | 3.79         | 3.32      | 0.47  | CO-CRYSTAL | CO-CRYSTAL/SALT |
| 28 | SODDOF01     | nicotinamide                               | 2-Hydroxybenzoic acid             | 98-92-0    | 69-72-7    | 3.54         | 3.01      | 0.53  | SALT       | CO-CRYSTAL/SALT |
| 29 | ENUFOJ       | 4,4'bipyridine                             | 5-Chlorosalicylate                | 553-26-4   | 321-14-2   | 3.27         | 2.64      | 0.63  | SALT       | CO-CRYSTAL/SALT |
| 30 | LEWRUA       | 2-Aminopyridinium                          | 2,6-dihydroxybenzoate             | 6280-88-2  | 303-07-1   | 1.97         | 1.3       | 0.67  | SALT       | CO-CRYSTAL/SALT |
| 31 | LATLAV       | N'-Isopropylideneisonicotinohydrazide      | salicylic acid                    | 4813-04-1  | 69-72-7    | 3.71         | 3.01      | 0.7   | CO-CRYSTAL | CO-CRYSTAL/SALT |
| 32 | LATKUO       | Isonicotinohydrazide                       | salicylic acid                    | 54-85-3    | 69-72-7    | 3.79         | 3.01      | 0.78  | CO-CRYSTAL | CO-CRYSTAL/SALT |
| 33 | WADJUI       | pyridine solvate                           | 3,4-Dihydroxybenzoic acid         | 110-86-1   | 99-30-3    | 5.23         | 4.45      | 0.78  | CO-CRYSTAL | CO-CRYSTAL/SALT |
| 34 | HONTAG       | 4-phenylpyridine                           | 4-hydroxybenzoic acid             | 939-23-1   | 99-96-7    | 5.45         | 4.57      | 0.88  | CO-CRYSTAL | CO-CRYSTAL/SALT |
| 35 | WADTOM       | quinoline                                  | 4-Chlorobenzoic acid              | 91-22-5    | 74-11-3    | 4.97         | 3.97      | 1     | CO-CRYSTAL | CO-CRYSTAL/SALT |
| 36 | LADBOJ       | 2-Amino-5-bromopyridinium                  | 4-cyanobenzoate                   | 1072-79-5  | 619-65-8   | 4.65         | 3.54      | 1.11  | SALT       | CO-CRYSTAL/SALT |
| 37 | RIBXAC       | 3-Hydroxypyridinium                        | 1-carboxybenzene-3-carboxylate    | 109-00-2   | 121-91-5   | 4.67         | 3.53      | 1.14  | SALT       | CO-CRYSTAL/SALT |
| 38 | DIWXOX       | bis(3-hydroxypyridinium)                   | 1,4-benzenedicarboxylate          | 109-00-2   | 100-21-0   | 4.67         | 3.49      | 1.18  | SALT       | CO-CRYSTAL/SALT |
| 39 | LORWIZ       | 3-(Carbamoyl)pyridinium                    | 2-carboxy-4,5-dichlorobenzoate    | 98-92-0    | 56962-08-4 | 3.54         | 2.35      | 1.19  | SALT       | CO-CRYSTAL/SALT |
| 40 | LADBUP       | 2-Amino-5-bromopyridinium                  | 4-nitrobenzoate                   | 1072-97-5  | 62-23-7    | 4.65         | 3.42      | 1.23  | SALT       | CO-CRYSTAL/SALT |
| 41 | PUKDOP       | 2-Amino-5-bromopyridinium                  | 3-aminobenzoate                   | 1072-97-5  | 99-05-8    | 4.65         | 3.34      | 1.31  | SALT       | CO-CRYSTAL/SALT |
| 42 | VIGDIZ       | 3-(4-Pyridinio)pyrazole                    | 2,6-difluorobenzoate              | 17784-60-0 | 385-00-2   | 3.74         | 2.34      | 1.4   | SALT       | CO-CRYSTAL/SALT |
| 43 | MOYSEZ       | 3-Aminopyridinium                          | 3,5-dimethyl-4-hydroxybenzoate    | 462-08-8   | 4919-37-3  | 6.16         | 4.71      | 1.45  | SALT       | CO-CRYSTAL/SALT |
| 44 | MOYQUN       | 3-Aminopyridinium                          | 4-hydroxybenzoate                 | 462-08-8   | 99-96-7    | 6.16         | 4.57      | 1.59  | SALT       | CO-CRYSTAL/SALT |

|    |          |                                             |                                         |            |             |      |      |      |            |                 |
|----|----------|---------------------------------------------|-----------------------------------------|------------|-------------|------|------|------|------------|-----------------|
| 45 | DUVCIH   | 2-Amino-5-bromopyridinium                   | 2-hydroxybenzoate                       | 1072-97-5  | 69-72-7     | 4.64 | 3.01 | 1.63 | SALT       | CO-CRYSTAL/SALT |
| 46 | TUPTUU   | 2-Amino-5-chloropyridinium                  | salicylate                              | 1072-98-6  | 69-72-7     | 4.67 | 3.01 | 1.66 | SALT       | CO-CRYSTAL/SALT |
| 47 | KUZJIZ   | 2-amino-5-chloropyridinium                  | 2-carboxybenzoate phthalic acid solvate | 1072-98-6  | 88-99-3     | 4.67 | 2.95 | 1.72 | SALT       | CO-CRYSTAL/SALT |
| 48 | KIXCOK   | 8-aminoquinolinium                          | 2-carboxy-4,5-dichlorobenzoate          | 578-66-5   | 56962-08-4  | 4.07 | 2.35 | 1.72 | SALT       | CO-CRYSTAL/SALT |
| 49 | IYUNOF   | pyridine solvate                            | terephthalic acid                       | 110-86-1   | 100-20-0    | 5.23 | 3.49 | 1.74 | CO-CRYSTAL | CO-CRYSTAL/SALT |
| 50 | NAYCUN   | 6-hydroxyquinolinium                        | 4-nitrobenzoate                         | 580-16-5   | 62-23-7     | 5.22 | 3.42 | 1.8  | SALT       | CO-CRYSTAL/SALT |
| 51 | LAPPIC   | 2-Aminopyridinium                           | 4-aminobenzoate                         | 6280-88-2  | 150-13-0    | 6.67 | 4.86 | 1.81 | SALT       | CO-CRYSTAL/SALT |
| 52 | MIPRIM   | 8-Aminoquinolinium                          | 5-nitrosalicylate                       | 578-66-5   | 96-97-9     | 4.09 | 2.28 | 1.81 | CO-CRYSTAL | CO-CRYSTAL/SALT |
| 53 | COWJEE   | 4-(2-amino-4-methylpyrimidino-6-yl)pyridine | 2,3,5,6-tetrafluoro-4-iodobenzoate      | 90916-52-2 | 873536-93-7 | 3.31 | 1.48 | 1.83 | SALT       | CO-CRYSTAL/SALT |
| 54 | COWJII   | 4-(2-amino-4-methylpyridinio-6-yl)pyridine  | 2,3,5,6-tetrafluoro-4-bromobenzoate     | 90916-52-2 | 4707-24-8   | 3.31 | 1.43 | 1.88 | SALT       | CO-CRYSTAL/SALT |
| 55 | UNAYIS   | pyridinium                                  | 2,4-dihydroxybenzoate                   | 110-86-1   | 89-86-1     | 5.23 | 3.32 | 1.91 | SALT       | CO-CRYSTAL/SALT |
| 56 | MOYRIC   | 3-Aminopyridinium                           | 3-fluoro-4-hydroxybenzoate              | 462-08-8   | 350-29-8    | 6.16 | 4.23 | 1.93 | SALT       | CO-CRYSTAL/SALT |
| 57 | MOYRUO   | 3-Aminopyridinium                           | 3-chloro-4-hydroxybenzoate              | 462-08-8   | 3964-58-7   | 6.16 | 4.2  | 1.96 | SALT       | CO-CRYSTAL/SALT |
| 58 | DOWQIQ   | 1-Pyridiniumylacetate                       | 4-hydroxybenzoic acid                   | 28356-58-3 | 99-96-7     | 6.57 | 4.57 | 2    | CO-CRYSTAL | CO-CRYSTAL/SALT |
| 59 | GAHFIF   | Acridine hemikis                            | terephthalic acid                       | 290-94-6   | 100-21-0    | 5.56 | 3.49 | 2.07 | CO-CRYSTAL | CO-CRYSTAL/SALT |
| 60 | IGAMUZ   | 2-Aminopyridinium                           | 4-hydroxybenzoate                       | 504-29-0   | 99-96-7     | 6.67 | 4.57 | 2.1  | SALT       | CO-CRYSTAL/SALT |
| 61 | XEBFOA   | quinoline                                   | 3,5-Dinitrobenzoic acid                 | 91-22-5    | 99-34-3     | 4.97 | 2.77 | 2.2  | CO-CRYSTAL | CO-CRYSTAL/SALT |
| 62 | MUCMUT   | 3-Aminopyridinium                           | 3,5-dihydroxybenzoate                   | 462-08-8   | 99-10-5     | 6.16 | 3.96 | 2.2  | SALT       | CO-CRYSTAL/SALT |
| 63 | MOZNAR   | 2,3-Diaminopyridinium                       | 4-hydroxybenzoate                       | 452-58-4   | 99-96-7     | 6.78 | 4.57 | 2.21 | SALT       | CO-CRYSTAL/SALT |
| 64 | IYUPAT   | Pyridinium hydrogen                         | phthalate                               | 110-86-1   | 88-99-3     | 5.23 | 2.95 | 2.28 | SALT       | CO-CRYSTAL/SALT |
| 65 | LUPZOL   | 2-Aminopyridinium                           | benzoate                                | 6280-88-2  | 65-85-0     | 6.67 | 4.2  | 2.47 | SALT       | CO-CRYSTAL/SALT |
| 66 | KUTXUT   | 2-Amino-5-methylpyridinium                  | 4-hydroxybenzoate                       | 1603-41-4  | 99-96-7     | 7.04 | 4.57 | 2.47 | SALT       | CO-CRYSTAL/SALT |
| 67 | RIZBUY   | 2-Amino-4-methylpyridinium                  | 4-aminobenzoate                         | 695-34-1   | 150-13-0    | 7.38 | 4.86 | 2.52 | SALT       | CO-CRYSTAL/SALT |
| 68 | LADBEZ   | 2-Aminopyridinium                           | 4-chlorobenzoate                        | 6280-88-2  | 74-11-3     | 6.67 | 3.97 | 2.7  | SALT       | CO-CRYSTAL/SALT |
| 69 | AJIWIA   | quinoline                                   | 2-chloro-5-benzoic acid                 | 91-22-5    | 2516-96-3   | 4.97 | 2.22 | 2.75 | CO-CRYSTAL | CO-CRYSTAL/SALT |
| 70 | TEZXIG   | 3-Aminopyridinium                           | 2,4-dihydroxybenzoate                   | 462-08-8   | 89-86-1     | 6.16 | 3.32 | 2.84 | SALT       | CO-CRYSTAL/SALT |
| 71 | YAGFAP   | quinoline                                   | 2-Chloro-4-nitrobenzoic acid            | 99-22-5    | 99-60-5     | 4.97 | 2.04 | 2.93 | CO-CRYSTAL | CO-CRYSTAL/SALT |
| 72 | LAQGOA   | 2-Aminopyridinium                           | isophthalate                            | 6280-88-2  | 121-91-5    | 6.67 | 3.53 | 3.14 | SALT       | SALT            |
| 73 | LAPMUL01 | 2-Aminopyridinium                           | terephthalate                           | 6280-88-2  | 100-21-0    | 6.67 | 3.49 | 3.18 | SALT       | SALT            |
| 74 | GAWROM   | 4-(4-pyridylamino)pyridinium                | isophthalate                            | 1915-42-0  | 121-91-5    | 6.76 | 3.53 | 3.23 | SALT       | SALT            |
| 75 | ODAZID01 | 2-Aminopyridinium                           | p-nitrobenzoate                         | 6280-88-2  | 62-23-7     | 6.67 | 3.42 | 3.25 | SALT       | SALT            |
| 76 | BEXPUQ   | 2-aminopyridinium                           | 3-aminobenzoate                         | 504-29-0   | 99_05_8     | 6.67 | 3.34 | 3.33 | SALT       | SALT            |
| 77 | IYUPIB   | Pyridinium                                  | trihydrogen pyromellitate               | 110-86-1   | 89_05_4     | 5.23 | 1.87 | 3.36 | SALT       | SALT            |
| 78 | KUyZUA   | 2-Amino-4,6-dimethylpyridinium              | benzoate                                | 5407-87-4  | 65-85-0     | 7.62 | 4.2  | 3.42 | SALT       | SALT            |
| 79 | MOZXOP   | 2,3-Diaminopyridinium                       | 3-aminobenzoate                         | 452-58-4   | 99-05-8     | 6.78 | 3.34 | 3.44 | SALT       | SALT            |
| 80 | ULEHID   | 2-Amino-6-methylpyridinium                  | 4-nitrobenzoate                         | 1824-81-3  | 62-23-7     | 6.95 | 3.42 | 3.53 | SALT       | SALT            |
| 81 | YUQKUR   | 2-Amino-4-methylpyridinium                  | 3-chlorobenzoate                        | 695-34-1   | 535-80-8    | 7.38 | 3.83 | 3.55 | SALT       | SALT            |
| 82 | VATTUH   | 2-Methylquinolinium                         | 5-nitrosalicylate                       | 91-63-4    | 96-97-9     | 5.91 | 2.28 | 3.63 | SALT       | SALT            |
| 83 | PUJWEX   | 2-Amino-5-methylpyridinium                  | 4-nitrobenzoate                         | 1603-41-4  | 62-23-7     | 7.07 | 3.42 | 3.65 | SALT       | SALT            |
| 84 | SLCADB10 | 2-Aminopyridinium                           | salicylate                              | 6280-88-2  | 69-72-7     | 6.67 | 3.01 | 3.66 | SALT       | SALT            |
| 85 | GUHREG   | 2,6-dimethylpyridinium                      | hydrogen phthalate                      | 108-48-5   | 88-99-3     | 6.67 | 2.95 | 3.72 | SALT       | SALT            |
| 86 | PUJWIB   | 2-amino-5-methylpyridinium                  | 3-aminobenzoate                         | 1603-41-4  | 99-05-8     | 7.07 | 3.34 | 3.73 | SALT       | SALT            |
| 87 | YAHZAK   | 2,3-Diaminopyridinium                       | 2-hydroxybenzoate                       | 452-58-4   | 69-72-7     | 6.78 | 3.01 | 3.77 | SALT       | SALT            |
| 88 | LEZJH    | Pyridinium                                  | 2,6-dihydroxybenzoate                   | 110-86-1   | 303-07-1    | 5.23 | 1.3  | 3.93 | SALT       | SALT            |
| 89 | QADHAE   | 2,6-Diaminopyridinium                       | 2-nitrobenzoate                         | 141-86-6   | 552-16-9    | 6.13 | 2.19 | 3.94 | SALT       | SALT            |

|     |        |                                 |                                |            |            |       |      |             |      |      |
|-----|--------|---------------------------------|--------------------------------|------------|------------|-------|------|-------------|------|------|
| 90  | DUNCOF | 2-Amino-4-methylpyridinium      | 4-nitrobenzoate                | 695-34-1   | 62-23-7    | 7.38  | 3.42 | <b>3.96</b> | SALT | SALT |
| 91  | KEFZAX | 2-Aminopyridinium               | 5-formylsalicylate             | 504-29-0   | 616-76-2   | 6.67  | 2.67 | <b>4</b>    | SALT | SALT |
| 92  | SUYIV  | 2-Amino-5-methylpyridinium      | 2-hydroxybenzoate              | 1603-41-4  | 69-72-7    | 7.04  | 3.01 | <b>4.03</b> | SALT | SALT |
| 93  | SUYMUV | 2-Amino-5-methylpyridinium      | 2-carboxybenzoate              | 1603-41-4  | 88-99-3    | 7.04  | 2.95 | <b>4.09</b> | SALT | SALT |
| 94  | DUSKIM | 2-Amino-4-methylpyridinium      | 2-carboxybenzoate              | 695-34-1   | 88-99-3    | 7.38  | 2.95 | <b>4.43</b> | SALT | SALT |
| 95  | REHFU  | 2-Methylquinolinium             | 2,4-dinitrobenzoate            | 91-63-4    | 610-30-0   | 5.91  | 1.43 | <b>4.48</b> | SALT | SALT |
| 96  | GODNIW | 2,4,6-trimethylpyridinium       | 3,5-dinitrobenzoate            | 108-75-8   | 99-34-3    | 7.33  | 2.77 | <b>4.56</b> | SALT | SALT |
| 97  | MOYRAU | 4-Aminopyridinium               | 3-hydroxybenzoate              | 504-24-5   | 99-06-9    | 9.26  | 4.08 | <b>5.18</b> | SALT | SALT |
| 98  | NUQVEB | 2-Amino-5-methylpyridinium      | 2-hydroxy-3,5-dinitrobenzoate  | 1603-41-4  | 609-99-4   | 7.04  | 1.54 | <b>5.5</b>  | SALT | SALT |
| 99  | DUSKOS | 2-Amino-4-methylpyridinium      | 2-hydroxy-3,5-dinitrobenzoate  | 695-34-1   | 609-99-4   | 7.38  | 1.54 | <b>5.84</b> | SALT | SALT |
| 100 | KOBNAQ | 4-(Dimethylamino)pyridinium     | 3,4-dinitrobenzoate            | 1122-58-3  | 528-45-0   | 9.52  | 2.81 | <b>6.71</b> | SALT | SALT |
| 101 | KOBNOE | 4-(Dimethylamino)pyridinium     | 3,5-dinitrobenzoate            | 1122-58-3  | 99-34-3    | 9.52  | 2.77 | <b>6.75</b> | SALT | SALT |
| 102 | HURNEN | 8-hydroquinolinium              | salicylate                     | 148-24-3   | 69-72-7    | 9.81  | 3.01 | <b>6.8</b>  | SALT | SALT |
| 103 | AFEDOE | 4-aminopyridium                 | 2-chloro-5-nitrobenzoate       | 504-24-5   | 2516-96-3  | 9.26  | 2.22 | <b>7.04</b> | SALT | SALT |
| 104 | AFEDIY | 4-aminopyridium                 | 2-chloro-4-nitrobenzoate       | 504-24-5   | 99-60-5    | 9.26  | 2.04 | <b>7.22</b> | SALT | SALT |
| 105 | AFEFAS | 4-aminopyridium                 | 4-chloro-2-nitrobenzoate       | 504-24-5   | 6280-88-2  | 9.26  | 1.97 | <b>7.29</b> | SALT | SALT |
| 106 | AFEDUK | 4-aminopyridium                 | 5-chloro-2-nitrobenzoate       | 504-24-5   | 2516-95-2  | 9.26  | 1.86 | <b>7.4</b>  | SALT | SALT |
| 107 | KIXCIE | 8-hydroquinolinium              | 2-carboxy-4,5-dichlorobenzoate | 148-24-3   | 56962-08-4 | 9.81  | 2.35 | <b>7.46</b> | SALT | SALT |
| 108 | KOBMAP | 4-(Dimethylamino)pyridinium     | 2,4-dinitrobenzoate            | 1122-58-3  | 610-30-0   | 9.52  | 1.43 | <b>8.09</b> | SALT | SALT |
| 109 | GEHHOR | N-(pyridiixylidenium)tolylamine | 4-nitrobenzoate                | 93688-50-7 | 62-23-7    | 11.64 | 3.42 | <b>8.22</b> | SALT | SALT |
